# Supplementary material
Source: Springer Nature journal article supplement (https://www.springermedizin.de/resource/supplementary/12935_2009_208_MOESM1_ESM.pdf/9541376)

**MCF-10A**

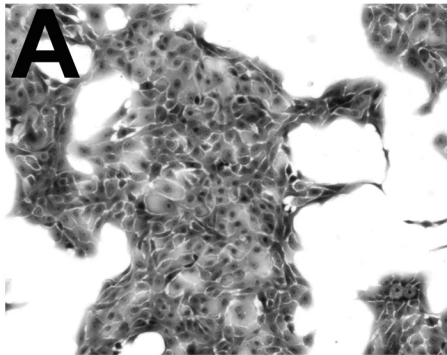

**MCF-10AT**

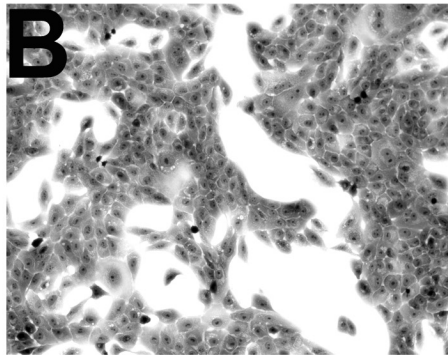

**MCF-10CA1a**

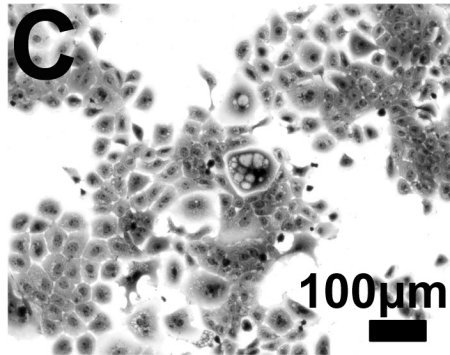

Supplement: MOESM1 [file 9541376]
